# Supplementary material
Source: ML conference proceedings conference paper supplement (https://proceedings.neurips.cc/paper_files/paper/2023/hash/c60bd92a01804b7df0540ed7ca2f7c05-Abstract.html)
Supplement: Supplementary file 1 [file c60bd92a01804b7df0540ed7ca2f7c05-Supplemental-Conference.pdf]

---

# Supplementary Materials for NAR-Former V2: Rethinking Transformer for Universal Neural Network Representation Learning

---

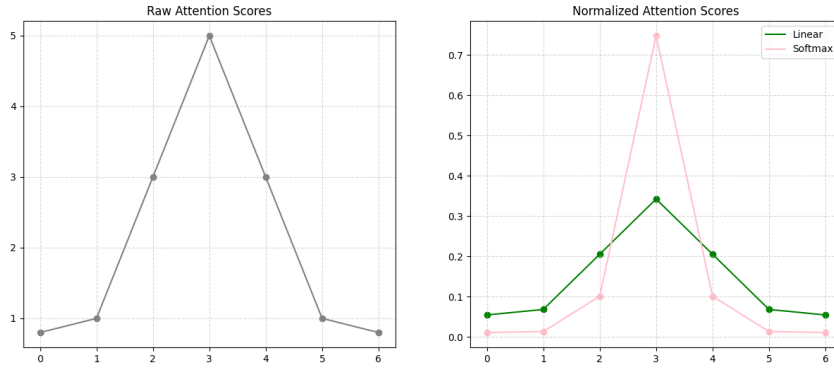

Figure 1: Left: Raw attention scores. Right: Normalized attention scores processed by two different normalization methods.

## 1 A More detailed comparison with original self-attention

2 As introduced in the main text, linear graph-aided attention is defined as:

$$X^l = \text{Sigmoid}(W_q^l \tilde{H}^l + b_q^l), \quad (1)$$

$$S^l = (X^l X^{lT} / \sqrt{d}) \odot A, \quad (2)$$

$$Z^l = W_a^l (\text{Norm}(S^l) \tilde{H}^l) + b_a^l. \quad (3)$$

3 Compared with the self-attention in vanilla Transformer:

$$Q^l = W_q^l H^{l-1} + b_q^l, K^l = W_k^l H^{l-1} + b_k^l, V^l = W_v^l H^{l-1} + b_v^l, \quad (4)$$

$$S^l = \text{Softmax}(Q^l K^{lT} / \sqrt{d}), \quad (5)$$

$$Z^l = W_a^l (S^l V) + b_a^l, \quad (6)$$

4 in addition to the control of attention calculation range detailed in the main text, the main differences  
5 between the two attention schemes lie in:

- 6 • the graph-aided attention doesn't use the softmax function;
- 7 • the graph-aided attention adopts sigmoid activation function.

8 As shown in the Fig. 1, the softmax function helps the self-attention layer in directing its attention  
9 distribution, ensuring the emphasis on both local and global features during extraction. This charac-  
10 teristic is important for tasks in the visual field. However, for neural network encoding, the situation

Table 1: Performance of searched architectures using different NAS algorithms in DARTS [7] space on CIFAR-10 [5]. † denotes using cutout [2] as data augmentation.

| Model                         | Parameters (M) | Top1 Acc (%) | No. of archs |
|-------------------------------|----------------|--------------|--------------|
| VGG-19 [18]                   | 20.0           | 95.10        | -            |
| DenseNet-BC [4]               | 25.6           | 96.54        | -            |
| Swin-S [9]                    | 50             | 94.17        | -            |
| Nest-S [17]                   | 38             | 96.97        | -            |
| Ransom search                 | 3.2            | 96.71        | -            |
| NASNet-A <sup>†</sup> [19]    | 3.3            | 97.35        | 20000        |
| AmoebaNet-A <sup>†</sup> [14] | 3.2            | 96.66        | 27000        |
| PNAS [6]                      | 3.2            | 96.59        | 1160         |
| NAONet [11]                   | 28.6           | 97.02        | 1000         |
| ENAS <sup>†</sup> [13]        | 4.6            | 97.11        | -            |
| DARTS <sup>†</sup> [7]        | 3.4            | 97.24        | -            |
| GATES <sup>†</sup> [12]       | 4.1            | 97.42        | 800          |
| CTNAS <sup>†</sup> [1]        | 3.6            | 97.41        | -            |
| TNASP <sup>†</sup> [10]       | 3.7            | 97.48        | 1000         |
| NAR-Former <sup>†</sup> [15]  | 3.8            | 97.52        | 100          |
| NAR-Former V2 <sup>†</sup>    | 3.5            | 97.54        | 100          |

Table 2: Average cost for one sample of NAS-Bench-101. The inference latency was measured on a machine with GeForce RTX 3090 GPU. The batch size was set to 1.

|               | Encode(ms) | Infer(ms) | Total(ms) |
|---------------|------------|-----------|-----------|
| NAR-Former    | 2.4784     | 17.4864   | 19.9648   |
| NAR-Former V2 | 2.3722     | 5.2276    | 7.5998    |

may be somewhat different. Due to the softmax, Eq. (5) focuses almost all attention on the current node while ignoring adjacent nodes, making it difficult to capture the topology of the neural network well. The Eq. (2) restricts attention to connected nodes by introducing the adjacency matrix. Considering that each neighboring node of the current node contributes to the representation of the network topology, we use linear attention to calculate attention and normalization without losing the information of neighboring nodes. The exponential function in the softmax function provides the nonlinear ability and guarantees the nonnegativity of elements. When softmax is replaced by linear normalization, we introduce the sigmoid activation function to achieve these two purposes.

## B More experiments

### B.1 Experiments on Darts

One important application of accuracy prediction is network architecture search (NAS). Here, we follow the NAS experiment of NAR-Former and evaluate our proposed model in the DARTS search space. To ensure fairness, we follow the experimental details adopted in NAR-Former [15].

Experimental results are listed in Table 1. NAR-Former v2 retains the advantages of NAR-Former and also performs well in network architecture search. Thanks to its superior model performance, it only requires evaluating a small number of candidate networks to achieve excellent results in the search process. Based on NAR-Former v2, we obtained a model that has fewer parameters while having higher Top1 Accuracy compared with other predictor-based NAS methods.

In addition, as shown in Table 2, NAR-Former v2 achieves faster inference speed compared to NAR-Former as it has a more concise architecture.

### B.2 Experiments on NNLP

In this part, we use Mean Absolute Percentage Error (MAPE) and Error Bound Accuracy (Acc( $\delta$ )) to measure the deviations between latency predictions and ground truths [8].

34 The MAPE is defined as:

$$\text{MAPE} = \frac{1}{n} \sum_{i=1}^n \frac{|y_i - y'_i|}{y_i} \times 100\%. \quad (7)$$

35 MAPE is a non-negative number and the smaller value means the more precision prediction.

36 The  $\text{Acc}(\delta)$  can be calculated by:

$$\text{Acc}(\delta) = \frac{1}{n} \sum_{i=1}^n \text{cnt}\left(\frac{|y_i - y'_i|}{y_i} \leq \delta\right) \times 100\%, \quad (8)$$

37 where  $\text{cnt}(x)$  is a counting function, with a value of 1 when condition  $x$  is satisfied. The larger the  
38  $\text{Acc}(\delta)$ , the better the prediction performance.

### 39 B.3 Experiments on NAS-Bench-201

40 For a more comprehensive comparison with baseline [15] in terms of accuracy prediction, we added  
41 the 10% error bound accuracy metric (ACC (10%)), which reflects the accuracy of predicting exact  
42 values, and the standard deviation indicator, which reflects the stability of the method, respectively.  
43 The results are shown in Tab. 3. The results of ACC (10%) show that our NAR-Former V2 outper-  
44 forms NAR-Former [15] in the prediction of exact values, in addition to the relative ordering, which  
45 also reflects that our method learns a more reasonable representation. Comparing the standard devi-  
46 ations of the two methods shows that our NAR-Former V2 is more stable than NAR-Former [15].

Table 3: More metrics results for accuracy prediction on NAS-Bench-201 [3]

| Train/Test      | Kendall’s Tau |               | ACC (10%) |          |
|-----------------|---------------|---------------|-----------|----------|
|                 | 424/all       | 1563/all      | 424/all   | 1563/all |
| NAR-Former [15] | 0.8631±0.0080 | 0.8967±0.0029 | 96.77     | 99.32    |
| NAR-Former V2   | 0.8735±0.0026 | 0.8875±0.0013 | 99.45     | 99.50    |

47 In this paper, we show the results of applying our method to predict accuracy and latency, two of the  
48 most frequently considered attributes in network design and deployment. Our approach can also be  
49 easily used to predict other attributes of neural networks, simply by changing labels and adjusting  
50 hyperparameters as needed. We use our NAR-Former V2 with the same hyperparameters as the  
51 experiments on the NASBench family to predict the testing loss. This experiment is conducted  
52 on NAS-Bench-201. 5% of the whole data is used as the training set and another 200 samples  
53 are used for validation. The results are shown in Tab. 4. Kendall’s Tau is 0.851, indicating that  
54 our model is capable of predicting the relative ordering of the testing loss for the entire dataset  
55 (15625 samples) with high correlation. The value of the other three metrics MAPE, ACC(10%), and  
56 ACC(5%) demonstrate the high accuracy of our method in predicting the actual values of the testing  
57 loss.

## 58 C Implementation details

### 59 C.1 Encoding details

60 For accuracy prediction, the length of operation encoding and position encoding is both 64 and  
61 the total encoding length of each node is 128. For latency prediction, the length of operation type  
62 encoding is 32, and the length of encoding of each attribute (e.g. kernel size, number of groups, the  
63 height of tensor, the width of tensor, and so on) is 10. There are a total of 12 attributes for each  
64 node, including 8 parameters related to the model definition and 4 attributes that describe the shape  
65 of node output tensors. Therefore, in latency prediction, the length of a single node of the initial

Table 4: Testing loss prediction on NAS-Bench-201 [3]

| Metrics       | Kendall’s Tau↑ | ACC(10%)↑ | ACC(5%)↑ | MAPE↓ |
|---------------|----------------|-----------|----------|-------|
| NAR-Former V2 | 0.851          | 96.01     | 77.70    | 3.48  |

66 encoding is 152. The total encoding length of the four static attributes (batch size, memory access,  
67 parameter quantity, and FLOPs) is 40, which, together with the output of the transformer, is used for  
68 the final latency prediction.

## 69 C.2 Model details

70 The output dimension of each Transformer block is 512. The ratio of the hidden dimension to the  
71 input dimension in the grouped feed-forward networks of the Transformer block is fixed to 1:4.

## 72 C.3 Training details

### 73 C.3.1 Latency prediction on>NNLQP

74 We follow the>NNLQP[8] training setup to train each model for our latency prediction experiments.  
75 That is, the batch size is 16 and the number of epochs is 50.

### 76 C.3.2 Accuracy prediction on NAS-Bench-101

77 The NAS-Bench-101[16] repeated the training and evaluation of all architecture on CIFAR-10 for  
78 three times. There are accuracies after training with 4 different epochs: 4, 12, 36, and 108. The  
79 accuracies after training with 108 epochs are adopted in our experiments. We use the average valida-  
80 tion accuracy of each architecture as the training target and the average testing accuracy to evaluate  
81 the testing performance of the trained predictor.

82 Following the NAR-Former [15], we use the information flow consistency augmentation. The  
83 weight of MSE loss, SR\_loss, and AC\_loss is 1, 0.1 and 0.5, respectively. We determined to train  
84 our predictor for 3000 epochs based on the convergence of the learning curve on the training set.

### 85 C.3.3 Accuracy prediction on NAS-Bench-201

86 The NAS-Bench-201[3] trained and evaluated each architecture on three datasets: CIFAR-10,  
87 CIFAR-100, and ImageNet-16-120. In our experiments, the accuracy of each architecture on CIFAR-  
88 10 is used. The validation accuracy and testing accuracy of each architecture are used for building  
89 training ground truth and testing ground truth, respectively.

90 The setting of the loss function is similar to that of NAS-Bench-101. The predictor is trained for  
91 1000 epochs in this part.

## 92 References

- 93 [1] Yafo Chen, Yong Guo, Qi Chen, Minli Li, Wei Zeng, Yaowei Wang, and Minghui Tan. Contrastive neural  
94 architecture search with neural architecture comparators. In *Proceedings of the IEEE/CVF Conference on*  
95 *Computer Vision and Pattern Recognition*, pages 9502–9511, 2021.
- 96 [2] Terrance DeVries and Graham W Taylor. Improved regularization of convolutional neural networks with  
97 cutout. *arXiv preprint arXiv:1708.04552*, 2017.
- 98 [3] Xuanyi Dong and Yi Yang. Nas-bench-201: Extending the scope of reproducible neural architecture  
99 search. *arXiv preprint arXiv:2001.00326*, 2020.
- 100 [4] Gao Huang, Zhuang Liu, Laurens Van Der Maaten, and Kilian Q Weinberger. Densely connected con-  
101 volutional networks. In *Proceedings of the IEEE conference on computer vision and pattern recognition*,  
102 pages 4700–4708, 2017.
- 103 [5] Alex Krizhevsky, Geoffrey Hinton, et al. Learning multiple layers of features from tiny images. 2009.
- 104 [6] Chenxi Liu, Barret Zoph, Maxim Neumann, Jonathon Shlens, Wei Hua, Li-Jia Li, Li Fei-Fei, Alan Yuille,  
105 Jonathan Huang, and Kevin Murphy. Progressive neural architecture search. In *Proceedings of the Euro-*  
106 *pean conference on computer vision (ECCV)*, pages 19–34, 2018.
- 107 [7] Hanxiao Liu, Karen Simonyan, and Yiming Yang. Darts: Differentiable architecture search. *arXiv*  
108 *preprint arXiv:1806.09055*, 2018.

- 109 [8] Liang Liu, Mingzhu Shen, Ruihao Gong, Fengwei Yu, and Hailong Yang. Nnlqp: A multi-platform neural  
110 network latency query and prediction system with an evolving database. In *51 International Conference*  
111 *on Parallel Processing - ICPP, ICPP '22*. Association for Computing Machinery, 2022.
- 112 [9] Ze Liu, Yutong Lin, Yue Cao, Han Hu, Yixuan Wei, Zheng Zhang, Stephen Lin, and Baining Guo. Swin  
113 transformer: Hierarchical vision transformer using shifted windows. In *Proceedings of the IEEE/CVF*  
114 *International Conference on Computer Vision*, pages 10012–10022, 2021.
- 115 [10] Shun Lu, Jixiang Li, Jianchao Tan, Sen Yang, and Ji Liu. Tnasp: A transformer-based nas predictor with a  
116 self-evolution framework. *Advances in Neural Information Processing Systems*, 34:15125–15137, 2021.
- 117 [11] Renqian Luo, Fei Tian, Tao Qin, Enhong Chen, and Tie-Yan Liu. Neural architecture optimization. *Ad-*  
118 *vances in neural information processing systems*, 31, 2018.
- 119 [12] Xuefei Ning, Yin Zheng, Tianchen Zhao, Yu Wang, and Huazhong Yang. A generic graph-based neural  
120 architecture encoding scheme for predictor-based nas. In *European Conference on Computer Vision*,  
121 pages 189–204. Springer, 2020.
- 122 [13] Hieu Pham, Melody Guan, Barret Zoph, Quoc Le, and Jeff Dean. Efficient neural architecture search via  
123 parameters sharing. In *International conference on machine learning*, pages 4095–4104. PMLR, 2018.
- 124 [14] Esteban Real, Alok Aggarwal, Yanping Huang, and Quoc V Le. Regularized evolution for image classifier  
125 architecture search. In *Proceedings of the aaai conference on artificial intelligence*, volume 33, pages  
126 4780–4789, 2019.
- 127 [15] Yun Yi, Haokui Zhang, Wenze Hu, Nannan Wang, and Xiaoyu Wang. Nar-former: Neural architecture  
128 representation learning towards holistic attributes prediction. *arXiv preprint arXiv:2211.08024*, 2022.
- 129 [16] Chris Ying, Aaron Klein, Eric Christiansen, Esteban Real, Kevin Murphy, and Frank Hutter. Nas-bench-  
130 101: Towards reproducible neural architecture search. In *International Conference on Machine Learning*,  
131 pages 7105–7114. PMLR, 2019.
- 132 [17] Zizhao Zhang, Han Zhang, Long Zhao, Ting Chen, Sercan Ö Arik, and Tomas Pfister. Nested hierarchical  
133 transformer: Towards accurate, data-efficient and interpretable visual understanding. In *Proceedings of*  
134 *the AAAI Conference on Artificial Intelligence*, volume 36, pages 3417–3425, 2022.
- 135 [18] Chen Zhu, Renkun Ni, Zheng Xu, Kezhi Kong, W Ronny Huang, and Tom Goldstein. Gradinit: Learning  
136 to initialize neural networks for stable and efficient training. *Advances in Neural Information Processing*  
137 *Systems*, 34:16410–16422, 2021.
- 138 [19] Barret Zoph and Quoc V Le. Neural architecture search with reinforcement learning. *arXiv preprint*  
139 *arXiv:1611.01578*, 2016.
